# Supplementary material for: Efficacy and mechanism of the artificial sweetener saccharin degradation by thermally activated persulfate in aquatic environments
Source: Royal Society of Chemistry journal article supplement (doi:10.1039/d4ew00357h), 2024-01-01
Supplement: d4ew00357h1.pdf [file d4ew00357h1.pdf]

## Supplementary Information

### **Efficacy and mechanism of the artificial sweetener saccharin degradation by thermally activated persulfate in aquatic environments**

Webber Wei-Po Lai\*, Chia-Ming Chang

Department of Environmental Science and Engineering, Tunghai University, Taichung 407, Taiwan

\*Corresponding author: Webber Wei-Po Lai ([wplai@thu.edu.tw](mailto:wplai@thu.edu.tw))

#### Contents

1 Text

6 Tables

2 Figures

**Text S1** Description of the chemicals/reagents used in this study.

Saccharin (99%), sodium persulfate ( $\text{Na}_2\text{S}_2\text{O}_8$ , 98%), monopotassium phosphate ( $\text{KH}_2\text{PO}_4$ , 98%), dipotassium phosphate ( $\text{K}_2\text{HPO}_4$ , 99%), sodium hydroxide ( $\text{NaOH}$ , 97%), sodium chloride ( $\text{NaCl}$ , 99%), sodium nitrate ( $\text{NaNO}_3$ , 99%), 5,5-dimethyl-1-pyrroline N-oxide (DMPO, 98%) and ethanol ( $\text{EtOH}$ , 99.8%) were obtained from Sigma–Aldrich (USA). Sulfuric acid ( $\text{H}_2\text{SO}_4$ , 97%), sodium bicarbonate ( $\text{NaHCO}_3$ , 99.7%) and phosphoric acid (85%) were purchased from Fluka (Switzerland). *tert*-Butanol (*t*-BuOH, 99%) was obtained from Alfa Aesar (USA). HPLC-grade methanol (99.9%) was acquired from Duksan Pure Chemicals (Korea). The Suwannee River fulvic acid standard material (1S101F) (99%) was purchased from the International Humic Substance Society (USA). All solutions were prepared by using a Milli-Q water purification system (resistivity of 18.2 M $\Omega$ -cm; Merck Millipore, USA). All the solutions utilized in this work were stored in amber glass bottles in a 4 °C refrigerator until further use.

**Table S1** Degradation of saccharin in different treatment processes.

| Treatment process                                                                                                | Saccharin removal rate               | Experimental condition                                                                                                                                                                   | Reference          |
|------------------------------------------------------------------------------------------------------------------|--------------------------------------|------------------------------------------------------------------------------------------------------------------------------------------------------------------------------------------|--------------------|
| Electro-Fenton                                                                                                   | Complete removal in less than 30 min | <ul style="list-style-type: none"> <li>- [saccharin] = 0.2 mM (<math>\approx</math>36.6 mg/L)</li> <li>- [Fe<sup>2+</sup>] = 0.2 mM</li> <li>- pH = 3.0</li> <li>- I = 200 mA</li> </ul> | (Lin et al., 2016) |
| Metal organic framework (MOF) material<br>activated peroxydisulfate<br>- MOF material: Bio-MOF-11-Co<br>catalyst | 60.7% removal after 120 min          | <ul style="list-style-type: none"> <li>- [saccharin] = 50 mg/L</li> <li>- [MOF material] = 1 g/L</li> <li>- [PMS] = 10 g/L</li> </ul>                                                    | (Ma et al., 2021a) |
| UV/persulfate                                                                                                    | 85.39% removal after 60 min          | <ul style="list-style-type: none"> <li>- [saccharin] = 0.11 mM (<math>\approx</math>20 mg/L)</li> <li>- [persulfate] = 1.05 mM</li> <li>- pH = 7.0</li> </ul>                            | (Ma et al., 2021b) |
| UV/H <sub>2</sub> O <sub>2</sub>                                                                                 | 99.61% removal after 60 min          | <ul style="list-style-type: none"> <li>- [saccharin] = 20 mg/L</li> <li>- [H<sub>2</sub>O<sub>2</sub>] = 1.05 mM</li> <li>- pH = 7.0</li> </ul>                                          | (Ye et al., 2022)  |
| Ozonation                                                                                                        | >99% removal after 60 min            | <ul style="list-style-type: none"> <li>- [saccharin] = 20 mg/L</li> <li>- pH = 7.0</li> <li>- ozone flow rate = 7.10 mg/min</li> </ul>                                                   | (Lin et al., 2023) |
| Thermal/persulfate                                                                                               | Complete removal after 90 min        | <ul style="list-style-type: none"> <li>- [saccharin] = 5 mg/L</li> <li>- [persulfate] = 100 mg/L</li> <li>- pH = 7.0</li> <li>- temperature = 70 °C</li> </ul>                           | This study         |

Lin, H., Wu, J., Oturan, N., Zhang, H. and Oturan, M.A. 2016. Degradation of artificial sweetener saccharin in aqueous medium by electrochemically generated hydroxyl radicals. *Environ Sci Pollut R* 23(5), 4442-4453.

Lin, Z.Z., Guo, Y., Qu, X.X., Xiang, Y.Y. and Zhu, X. 2023. Oxidative abatement of saccharin by ozone and its influence on DBPs formation during postchlorination. *J Water Process Eng* 56.

Ma, X.Y., Liu, Z.H., Yang, Y.L., Zhu, L.D., Deng, J., Lu, S.J., Li, X.Y. and Dietrich, A.M. 2021a. Aqueous degradation of artificial sweeteners saccharin and neotame by metal organic framework material. *Sci Total Environ* 761.

Ma, X.Y., Tang, L.J., Deng, J., Liu, Z.H., Li, X.Y., Wang, P. and Li, Q.S. 2021b. Removal of saccharin by UV/persulfate process: Degradation kinetics, mechanism and DBPs formation. *J Photoch Photobio A* 420.

**Table S2** Conditions of the chromatographic analysis of saccharin transformation byproducts.

|                    | Saccharin transformation byproducts                                                                                                                                                                                                    |
|--------------------|----------------------------------------------------------------------------------------------------------------------------------------------------------------------------------------------------------------------------------------|
| Mode               | gradient                                                                                                                                                                                                                               |
| Total elution time | 11 min                                                                                                                                                                                                                                 |
| Mobile phases      | A: 1 mM ammonium acetate in DI water<br>B: 1 mM ammonium acetate in LCMS-grade methanol                                                                                                                                                |
| Flow rate          | 1 mL/min                                                                                                                                                                                                                               |
| Injection volume   | 20 $\mu$ L                                                                                                                                                                                                                             |
| Gradient condition | - 0 min: 90% (A): 10% (B)<br>- 0.5 min: 95% (A): 5% (B)<br>- 3 min: 60% (A): 40% (B)<br>- 6 min: 40% (A): 60% (B)<br>- 7 min: 0% (A): 100% (B)<br>- 9 min: 0% (A): 100% (B)<br>- 9.5 min: 95% (A): 5% (B)<br>- 11 min: 95% (A): 5% (B) |

**Table S3** Conditions of the mass spectrometric analysis of saccharin transformation byproducts.

|                            |                  |
|----------------------------|------------------|
| Mode                       | ESI negative     |
| Ion source gas 1           | 50 L/h           |
| Ion source gas 2           | 50 L/h           |
| Curtain gas                | 20 L/h           |
| Temperature                | 500 $^{\circ}$ C |
| Ion spray voltage floating | -4500 V          |
| Mass scan range            | 50–500 m/z       |
| Declustering potential     | -98 V            |
| collision energy           | -10 V            |

**Table S4** Summary of thermal/persulfate treatments applied to different contaminants

| <b>Contaminant</b> | <b>Initial compound concentration</b> | <b>Persulfate dosage</b> | <b>Operating temperature</b> | <b>Removal rate</b> | <b>Pseudo-first-order rate constant</b> | <b>Reference</b>        |
|--------------------|---------------------------------------|--------------------------|------------------------------|---------------------|-----------------------------------------|-------------------------|
| carbamazepine      | 0.04 mM                               | 1 mM                     | 70 °C                        | 100% after 80 min   | 0.0566 min <sup>-1</sup>                | (Deng et al., 2013)     |
| naproxen           | 0.05 mM                               | 1 mM                     | 60 °C                        | 100% after 90 min   | 0.0269 min <sup>-1</sup>                | (Ghauch et al., 2015)   |
| triclosan          | 0.031 mM                              | 0.155 mM                 | 70 °C                        | 100% after 120 min  | 0.0097 min <sup>-1</sup>                | (Gao et al., 2016)      |
| valsartan          | 500 µg/L                              | 100 mg/L                 | 50 °C                        | 100% after 30 min   | 0.1453 min <sup>-1</sup>                | (Arvaniti et al., 2020) |
| congo red          | 20 mg/L                               | 1 mM                     | 60 °C                        | –                   | 0.0313 min <sup>-1</sup>                | (Luo et al., 2020)      |
| ofloxacin          | 0.03 mM                               | 4 mM                     | 70 °C                        | 100% after 80 min   | 0.0611 min <sup>-1</sup>                | (Li et al., 2022)       |
| dexamethasone      | 500 µg/L                              | 100 mg/L                 | 50 °C                        | 98% after 45 min    | 0.0782 min <sup>-1</sup>                | (Arvaniti et al., 2022) |
| acyclovir          | 40 µM                                 | 2 mM                     | 70 °C                        | 95% after 30 min    | 0.0326 min <sup>-1</sup>                | (Ding et al., 2023)     |
| saccharin          | 5 mg/L                                | 100 mg/L                 | 70 °C                        | 100% after 90 min   | 0.0230 min <sup>-1</sup>                | This study              |

- Arvaniti, O.S., Bairamis, F., Konstantinou, I., Mantzavinos, D. and Frontistis, Z. 2020. Degradation of antihypertensive drug valsartan in water matrices by heat and heat/ultrasound activated persulfate: kinetics, synergy effect and transformation products. *Chemical Engineering Journal Advances* 4, 100062.
- Arvaniti, O.S., Ioannidi, A.A., Politi, A., Miserli, K., Konstantinou, I., Mantzavinos, D. and Frontistis, Z. 2022. Dexamethasone degradation in aqueous medium by a thermally activated persulfate system: Kinetics and transformation products. *J Water Process Eng* 49.
- Deng, J., Shao, Y.S., Gao, N.Y., Deng, Y., Zhou, S.Q. and Hu, X.H. 2013. Thermally activated persulfate (TAP) oxidation of antiepileptic drug carbamazepine in water. *Chem Eng J* 228, 765-771.
- Ding, C.S., Cai, Z.Y., Hu, C.K., Lei, J., Wang, L., Li, Q.S., Li, X.Y. and Deng, J. 2023. Degradation of antiviral drug acyclovir by thermal activated persulfate process: Kinetics study and modeling. *Chemosphere* 323.
- Gao, H.P., Chen, J.B., Zhang, Y.L. and Zhou, X.F. 2016. Sulfate radicals induced degradation of Triclosan in thermally activated persulfate system. *Chem Eng J* 306, 522-530.
- Ghauch, A., Tuqan, A. and Kibbi, N. 2015. Naproxen abatement by thermally activated persulfate in aqueous systems. *Chem Eng J* 279, 861-873.
- Li, T.T., Lu, S., Lin, W.W., Ren, H.J. and Zhou, R. 2022. Heat-activated persulfate oxidative degradation of ofloxacin: Kinetics, mechanisms, and toxicity assessment. *Chem Eng J* 433.
- Luo, C.W., Wu, D.J., Gan, L., Cheng, X.X., Ma, Q., Tan, F.X., Gao, J., Zhou, W.W., Wang, S.S., Zhang, F.M. and Ma, J. 2020. Oxidation of Congo red by thermally activated persulfate process: Kinetics and transformation pathway. *Sep Purif Technol* 244.

**Table S5** Water quality conditions of the sampled water matrices.

| Water matrices | Solution pH | TOC (mg/L) | Alkalinity (mM HCO <sub>3</sub> <sup>-</sup> ) | NO <sub>3</sub> <sup>-</sup> (mM) | Cl <sup>-</sup> (mM) |
|----------------|-------------|------------|------------------------------------------------|-----------------------------------|----------------------|
| Groundwater    | 6.35        | 6.05       | 0.82                                           | 0.24                              | 1.25                 |
| WWTP effluent  | 7.37        | 10.30      | 1.09                                           | 0.31                              | 0.94                 |
| River water    | 7.6         | 11.30      | 1.82                                           | 0.05                              | 1.58                 |

**Table S6** Mass spectrometry information obtained for the saccharin byproducts TP1 and TP2.

| Byproducts | Formula                                         | Retention time (min) | Measured m/z<br>[M-H] <sup>-</sup> | Theoretical m/z<br>[M-H] <sup>-</sup> | Mass error<br>(Δppm) | Proposed structure                                                                  |
|------------|-------------------------------------------------|----------------------|------------------------------------|---------------------------------------|----------------------|-------------------------------------------------------------------------------------|
| TP1        | C <sub>7</sub> H <sub>5</sub> NO <sub>4</sub> S | 1.86                 | 197.9870                           | 197.9866                              | -0.1                 | 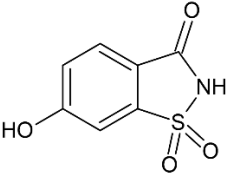 |
| TP2        | C <sub>7</sub> H <sub>5</sub> NO <sub>5</sub> S | 1.92                 | 213.9820                           | 213.9816                              | 0.4                  |  |

Spectrum from 05.wiff (sample 1) - 10, Experiment 7, -TOFMS<sup>2</sup> of 174.0 to 200.0 (50 - 500) from 1.867 min-from Analytics

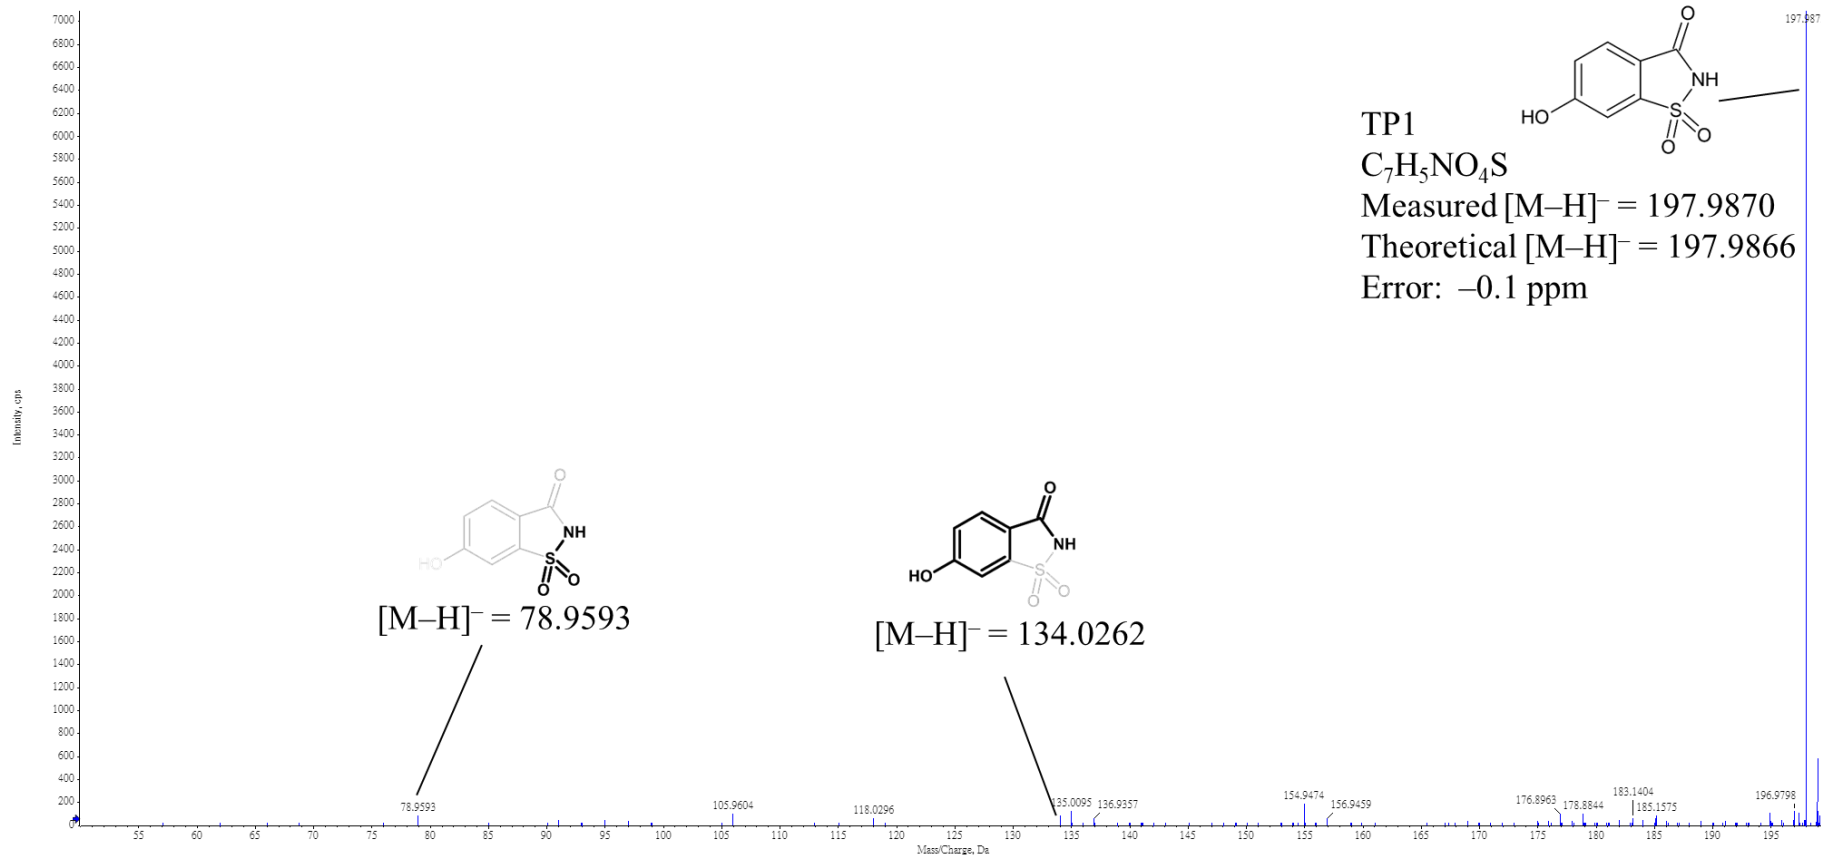

TP1

$C_7H_5NO_4S$

Measured  $[M-H]^- = 197.9870$

Theoretical  $[M-H]^- = 197.9866$

Error:  $-0.1$  ppm

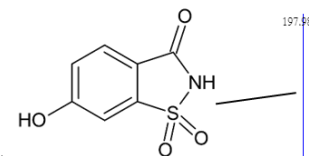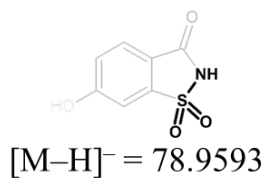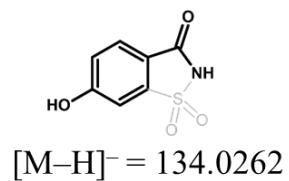

Figure S1(a) MS<sup>2</sup> fragmentation spectrum of TP1



Spectrum from 04\_wiff (sample 1) - 5, Experiment 8, -TOF MS<sup>2</sup> of 199.0 to 225.0 (50 - 500) from 1.850 min-from Analytics

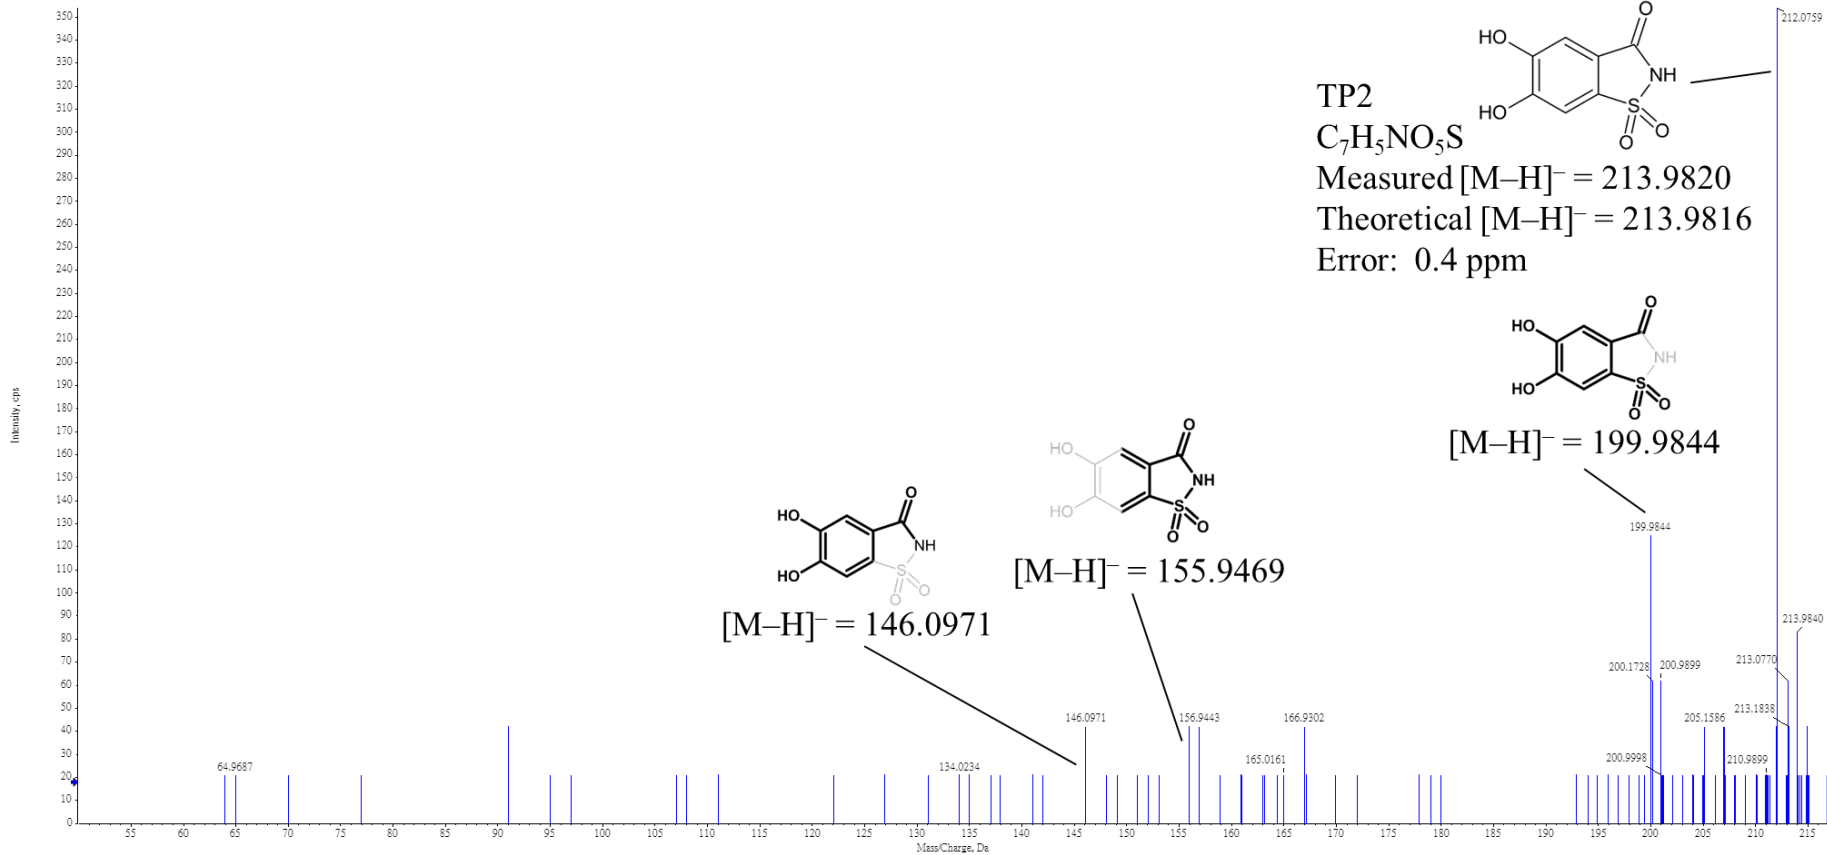

Figure S1(b) MS<sup>2</sup> fragmentation spectrum of TP2

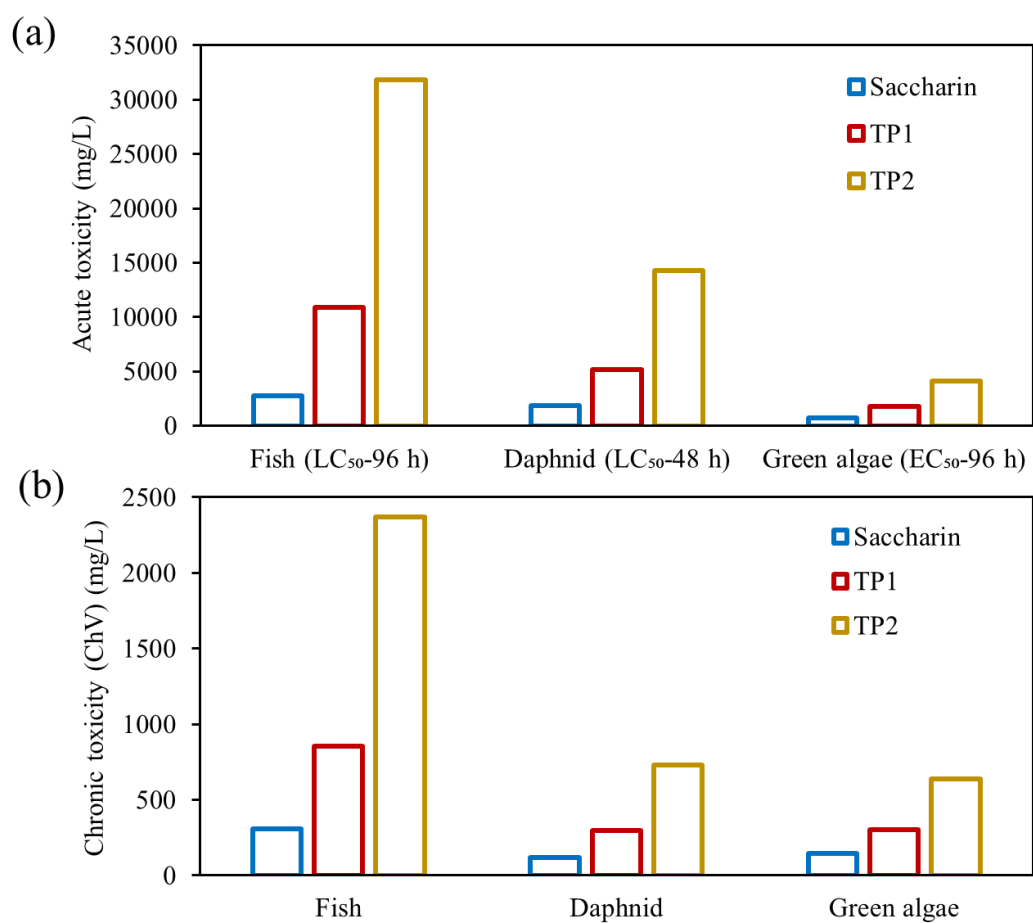

**Figure S2** (a) Acute and (b) chronic toxicity of saccharin and the byproducts TP1 and TP2 toward the aquatic organisms fish, daphnids and green algae predicted by ECOSAR.
